# Supplementary material for: Modulation of gentamicin-induced acute kidney injury by myo-inositol oxygenase via the ROS/ALOX-12/12-HETE/GPR31 signaling pathway
Source: JCI journal article supplement (doi:10.1172/jci.insight.155487), 2022-03-21
Supplement: sd1 [file 1]

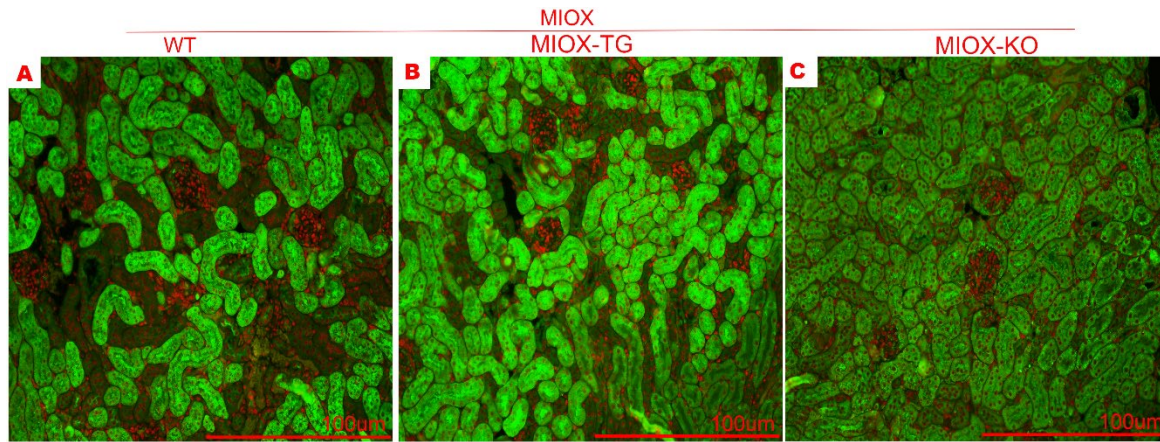

**Figure 1: Differential expression of MIOX in various strains of mice.** MIOX is expressed in renal cortical proximal tubules (Panels A vs B). MIOX-TG mice shows considerable increase in MIOX expression (Panel B). A background fluorescence signal is seen in kidney section of MIOX-KO mice (Panel C).
